# Supplementary material for: Boat anchoring contributes substantially to coral reef degradation in the British Virgin Islands
Source: PeerJ. 2019 May 23;7:e7010. doi: 10.7717/peerj.7010 (PMC6535217; doi:10.7717/peerj.7010)
Supplement: Supplemental Information 1 — Data are subdivided by groups of dependent variables. [file peerj-07-7010-s007.xlsx]

## Sheet: AnchHist
Site	Group	Anchoring	Moorings	Date	N_Boats	N_Boats_wom
Bails Ground Bay	10	high	n	2014-02-28	0	0
Bails Ground Bay	10	high	n	2014-02-14	2	2
Bails Ground Bay	10	high	n	2013-04-02	0	0
Bails Ground Bay	10	high	n	2013-02-12	0	0
Bails Ground Bay	10	high	n	2012-08-29	0	0
Bails Ground Bay	10	high	n	2012-01-03	0	0
Bails Ground Bay	10	high	n	2005-11-29	0	0
Bigelow Beach	2	low	n	2014-02-28	0	0
Bigelow Beach	2	low	n	2014-02-14	0	0
Bigelow Beach	2	low	n	2013-02-12	0	0
Bigelow Beach	2	low	n	2012-08-29	0	0
Bigelow Beach	2	low	n	2005-11-29	1	1
Bigelow Beach South	2	low	n	2014-02-28	0	0
Bigelow Beach South	2	low	n	2014-02-14	0	0
Bigelow Beach South	2	low	n	2013-02-12	0	0
Bigelow Beach South	2	low	n	2012-08-29	0	0
Bigelow Beach South	2	low	n	2005-11-29	1	1
Coral Gardens	3	high	y	2014-02-28	1	1
Coral Gardens	3	high	y	2013-03-25	3	2
Coral Gardens	3	high	y	2013-02-12	4	3
Coral Gardens	3	high	y	2012-01-06	3	2
Coral Gardens	3	high	y	2012-01-03	0	0
Coral Gardens	3	high	y	2005-11-29	2	2
Crab Cove	1	high	y	2014-02-28	1	1
Crab Cove	1	high	y	2014-02-14	0	0
Crab Cove	1	high	y	2013-02-12	0	0
Crab Cove	1	high	y	2012-08-29	0	0
Crab Cove	1	high	y	2012-01-03	0	0
Crab Cove	1	high	y	2006-07-16	1	1
Crab Cove	1	high	y	2005-09-10	0	0
Diamond Reef South	1	medium	y	2014-02-28	1	0
Diamond Reef South	1	medium	y	2014-02-14	2	0
Diamond Reef South	1	medium	y	2013-04-02	1	2
Diamond Reef South	1	medium	y	2013-03-25	3	0
Diamond Reef South	1	medium	y	2013-02-12	0	0
Diamond Reef South	1	medium	y	2012-08-29	0	0
Diamond Reef South	1	medium	y	2012-01-03	0	0
Diamond Reef South	1	medium	y	2005-11-29	1	1
Dip'n'Scrub	2	low	y	2014-02-28	0	0
Dip'n'Scrub	2	low	y	2013-04-02	0	0
Dip'n'Scrub	2	low	y	2013-03-25	0	0
Dip'n'Scrub	2	low	y	2013-02-12	0	0
Dip'n'Scrub	2	low	y	2012-08-29	0	0
Dip'n'Scrub	2	low	y	2012-01-03	0	0
Dip'n'Scrub	2	low	y	2005-11-29	0	0
George Dog East	3	low	n	2014-02-28	0	0
George Dog East	3	low	n	2013-08-11	0	0
George Dog East	3	low	n	2013-03-25	1	1
George Dog East	3	low	n	2013-02-12	0	0
George Dog East	3	low	n	2012-01-06	0	0
George Dog East	3	low	n	2005-11-29	0	0
George Dog South	3	high	y	2014-02-28	1	0
George Dog South	3	high	y	2013-03-25	4	3
George Dog South	3	high	y	2013-02-12	2	1
George Dog South	3	high	y	2012-01-06	1	1
George Dog South	3	high	y	2012-01-03	1	1
George Dog South	3	high	y	2005-11-29	1	1
Ginger Island South	7	low	y	2014-02-28	0	0
Ginger Island South	7	low	y	2013-03-25	1	1
Ginger Island South	7	low	y	2013-02-12	0	0
Ginger Island South	7	low	y	2004-04-06	0	0
Great Dog North	3	low	n	2014-02-28	0	0
Great Dog North	3	low	n	2013-03-25	0	0
Great Dog North	3	low	n	2013-02-12	2	2
Great Dog North	3	low	n	2012-01-03	1	1
Great Dog North	3	low	n	2005-11-29	0	0
Great Harbor	4	low	n	2014-07-01	0	0
Great Harbor	4	low	n	2013-11-22	0	0
Great Harbor	4	low	n	2013-08-24	0	0
Great Harbor	4	low	n	2013-07-28	0	0
Great Harbor	4	low	n	2013-02-12	0	0
Great Harbor	4	low	n	2004-02-12	0	0
Great Harbor	4	low	n	2002-10-29	0	0
Haulover Bay	7	high	y	2014-02-14	0	0
Haulover Bay	7	high	y	2013-08-11	0	0
Haulover Bay	7	high	y	2013-03-25	0	0
Haulover Bay	7	high	y	2013-02-12	1	1
Haulover Bay	7	high	y	2004-04-06	0	0
Iguana Head	1	low	n	2014-02-28	0	0
Iguana Head	1	low	n	2014-02-14	0	0
Iguana Head	1	low	n	2013-02-12	0	0
Iguana Head	1	low	n	2012-08-29	0	0
Iguana Head	1	low	n	2012-01-03	0	0
Iguana Head	1	low	n	2006-07-16	0	0
Iguana Head	1	low	n	2005-09-10	1	1
Lee Bay	10	low	n	2014-02-28	0	0
Lee Bay	10	low	n	2014-02-14	2	2
Lee Bay	10	low	n	2013-04-02	5	5
Lee Bay	10	low	n	2013-02-12	0	0
Lee Bay	10	low	n	2012-08-29	0	0
Lee Bay	10	low	n	2012-01-03	1	1
Lee Bay	10	low	n	2005-11-29	0	0
Long Bay	5	high	y	2013-08-11	0	0
Long Bay	5	high	y	2013-03-25	1	1
Long Bay	5	high	y	2012-01-06	0	0
Long Bay	5	high	y	2012-01-03	0	0
Long Bay	5	high	y	2005-11-29	1	1
Long Point	1	medium	y	2014-02-28	0	0
Long Point	1	medium	y	2014-02-14	0	0
Long Point	1	medium	y	2013-02-12	0	0
Long Point	1	medium	y	2012-08-29	0	0
Long Point	1	medium	y	2012-01-03	0	0
Long Point	1	medium	y	2006-07-16	0	0
Long Point	1	medium	y	2005-09-10	0	0
Monkey Point	2	medium	y	2014-02-28	0	0
Monkey Point	2	medium	y	2014-02-14	0	0
Monkey Point	2	medium	y	2013-04-02	0	0
Monkey Point	2	medium	y	2013-02-12	0	0
Monkey Point	2	medium	y	2012-08-29	0	0
Monkey Point	2	medium	y	2012-01-03	0	0
Monkey Point	2	medium	y	2006-07-16	0	0
Monkey Point	2	medium	y	2005-09-10	0	0
Mountain Point	5	low	y	2013-08-11	0	0
Mountain Point	5	low	y	2013-03-25	0	0
Mountain Point	5	low	y	2012-01-06	0	0
Mountain Point	5	low	y	2012-01-03	1	0
Mountain Point	5	low	y	2005-11-29	0	0
Pinguin Ghut	2	high	y	2014-02-28	1	0
Pinguin Ghut	2	high	y	2014-02-14	3	2
Pinguin Ghut	2	high	y	2013-04-02	4	2
Pinguin Ghut	2	high	y	2013-02-12	1	0
Pinguin Ghut	2	high	y	2012-08-29	0	0
Pinguin Ghut	2	high	y	2012-01-03	2	1
Pinguin Ghut	2	high	y	2005-09-10	0	0
White Bay	2	high	y	2014-02-28	6	6
White Bay	2	high	y	2014-02-14	10	10
White Bay	2	high	y	2013-04-02	1	1
White Bay	2	high	y	2013-02-12	2	2
White Bay	2	high	y	2012-08-29	0	0
White Bay	2	high	y	2012-01-03	3	3
White Bay	2	high	y	2005-09-10	0	0
White Bay Control	8	low	n	2014-02-14	0	0
White Bay Control	8	low	n	2013-11-22	0	0
White Bay Control	8	low	n	2013-08-24	0	0
White Bay Control	8	low	n	2013-04-02	0	0
White Bay Control	8	low	n	2013-02-12	0	0
White Bay Control	8	low	n	2004-01-30	0	0
White Bay Jost	4	high	y	2014-07-01	11	0
White Bay Jost	4	high	y	2013-11-22	10	0
White Bay Jost	4	high	y	2013-08-24	6	0
White Bay Jost	4	high	y	2013-07-28	7	0
White Bay Jost	4	high	y	2013-02-12	9	0
White Bay Jost	4	high	y	2004-02-12	11	0
White Bay Jost	4	high	y	2002-10-29	5	0
White Bay Mega	8	high	n	2014-02-14	0	0
White Bay Mega	8	high	n	2013-11-22	1	1
White Bay Mega	8	high	n	2013-08-24	0	0
White Bay Mega	8	high	n	2013-04-02	0	0
White Bay Mega	8	high	n	2013-02-12	1	1
White Bay Mega	8	high	n	2004-01-30	0	0

## Sheet: AnchLandDev
Site	Group	Anchoring	Moorings	D_Land	D_Dev
Bails Ground Bay	10	high	n	0.09	0.71
Bigelow Beach	2	low	n	0.14	1.36
Bigelow Beach South	2	low	n	0.9	1.35
Coral Gardens	3	high	y	0.16	2.8
Crab Cove	1	high	y	0.13	0.3
Diamond Reef South	1	medium	y	0.11	0.2
Dip'n'Scrub	2	low	y	0.15	0.16
George Dog East	3	low	n?	0.12	3.75
George Dog South	3	high	n?	0.09	4.16
Ginger Island South	7	low	y?	0.14	3.02
Great Dog North	3	low	n	0.7	2.95
Great Harbor	4	low	n	0.9	0.32
Haulover Bay	7	high	y	0.12	0.61
Iguana Head	1	low	n	0.06	0.56
Lee Bay	10	low	n	0.05	0.55
Long Bay	5	high	y	0.13	0.68
Long Point	1	medium	y	0.22	1.4
Monkey Point	2	medium	y	0.1	0.78
Mountain Point	5	low	y	0.07	0.83
Pinguin Ghut	2	high	y	0.07	0.9
White Bay	2	high	y	0.11	0.45
White Bay Control	8	low	n	0.33	0.4
White Bay Jost	4	high	y	0.9	0.1
White Bay Mega	8	high	n	0.51	0.82

## Sheet: Cover
Location	Group	Anchoring	Moorings	HardCoral_Avg	FireCoral_Avg	SeaFan_Avg	SoftBranch_Avg	SPErect_Avg	SPEncrusting_Avg	SPAll_Avg	ALFleshy_Avg	ALCalc_Avg	ALCrust_Avg	ALFila_Avg	ALAll_Avg	DeadCoral_Avg	Rubble_Avg	Sand_Avg	Other_Avg
Bails Ground Bay	10	high	n	11.5011	2.8271	7.90649	18.3528	2.3554	5.09223	7.44763	24.7277	0	2.18781	1.45913	28.3746	1.66909	3.42855	15.0437	3.44892
Bigelow Beach	2	low	n	20.0109	1.41509	17.1353	17.607	6.19557	6.17743	12.373	4.28157	0	3.81894	1.42417	9.52467	0.961538	1.44231	9.9873	1.92308
Coral Gardens	3	high	y	16.5972	3.88889	11.7361	20.1389	1.73611	0	1.73611	18.75	0	6.31944	4.65278	29.7222	5.97222	0.763889	9.44444	0
Crab Cove	1	high	y	10.7756	6.9017	4.42722	16.6675	2.7028	3.37534	6.07814	13.5941	0.466853	6.05658	0.978585	21.0961	10.0178	5.346	10.4594	7.07116
Diamond Reef South	1	medium	y	18.654	4.00606	5.54198	15.2109	8.66494	9.97165	18.6366	10.1126	1.78072	9.35051	6.83017	28.074	0	0.333333	6.75746	2.78563
Dip n Scrub	2	low	y	15.8111	3.80137	18.0601	22.4811	1.03509	1.40069	2.43577	25.3658	0	5.30167	1.35088	32.0184	1.81892	2.52067	1.05263	0
George Dog East	3	low	n?	16.4729	5.66448	15.5421	19.1749	2.36601	1.17796	3.54397	14.8075	0.584795	6.10839	0.877193	22.3779	5.96696	1.15447	3.87489	0.292398
Ginger South	7	low	y?	9.47854	3.20379	3.92362	5.49303	1.10599	1.7301	2.83609	27.2853	12.6418	22.9017	2.30769	65.1364	1.17384	0.868031	4.34016	1.17384
Haulover Bay	7	high	y	6.81144	1.35636	3.39433	11.5314	2.7658	1.57566	4.34146	18.8578	8.39567	8.63291	5.1145	41.0008	4.31424	7.87388	18.3673	1.00877
Iguana Head	1	low	n	19.1667	4.70238	6.40873	20.4167	2.34127	12.4603	14.8016	10.7937	1.13095	8.76984	0.555556	21.25	4.60317	4.84127	0.555556	0.873016
Lee Bay	10	low	n	19.1241	3.4366	13.1743	24.088	5.1875	9.14602	14.3335	6.92623	0	6.15657	0.47619	13.559	0.952381	1.42857	5.45681	4.4467
Long Point	1	medium	y	15.4879	6.19294	0.987449	19.0101	0.529101	0	0.529101	16.7097	0	5.11443	0.155039	21.9792	7.03888	7.59505	8.97871	12.2007
Monkey Point	2	medium	y	14.8258	2.46943	5.76058	20.4062	8.60133	7.32067	15.922	14.5462	0.311526	6.38609	0.953086	22.1969	1.35469	2.34479	5.03567	2.58474
White Bay	2	high	y	6.80612	0.537697	0.265957	6.70148	0.531915	5.3362	5.86812	26.1744	0.74559	7.71801	0.69909	35.337	5.67757	7.72663	11.4379	7.8978
White Bay Control	8	low	n	19.0765	2.12017	15.5429	24.3807	8.13106	4.23784	12.3689	8.12356	0.704225	7.76895	1.76306	18.3598	2.47977	2.12516	3.19149	0.35461
White Bay Mega	8	high	n	6.53853	0.889591	4.48125	6.1746	1.05759	2.18381	3.2414	18.3137	6.02942	13.9079	1.07462	39.3257	11.1559	14.0313	12.4625	1.69918

## Sheet: Morph
Date	Site	Group	Anchoring	Moorings	TotalTranL	MorphoGrp	AvgL	AvgW	AvgLiveArea	Sum1/L_m	Strng_Val	NperTran
2014-08-06	Bail's Ground Bay	10	high	n	120	Brain	0	0	0	0	0	0
2014-08-06	Bail's Ground Bay	10	high	n	120	Branching	7.5	10.8333	71.6667	90	0.75	1.5
2014-08-06	Bail's Ground Bay	10	high	n	120	Cup	0	0	0	0	0	0
2014-08-06	Bail's Ground Bay	10	high	n	120	Encrusting	13.3333	16.6667	255	31.6667	0.263889	0.75
2014-08-06	Bail's Ground Bay	10	high	n	120	Mound	11.7317	10.6341	121.122	643.274	5.36062	10.25
2014-08-06	Bail's Ground Bay	10	high	n	120	Pillar	0	0	0	0	0	0
2014-08-06	Bail's Ground Bay	10	high	n	120	Plate	4.57143	3.85714	21.7143	290	2.41667	1.75
All	Bigelow Beach	2	low	n	150	Brain	16.25	13.75	293.75	38.3333	0.255556	0.8
All	Bigelow Beach	2	low	n	150	Branching	10.7778	8.66667	161.889	292	1.94667	1.8
All	Bigelow Beach	2	low	n	150	Cup	5	5	25	20	0.133333	0.2
All	Bigelow Beach	2	low	n	150	Encrusting	0	0	0	0	0	0
All	Bigelow Beach	2	low	n	150	Mound	14.0805	12.8161	227.126	1827.64	12.1842	17.4
All	Bigelow Beach	2	low	n	150	Pillar	0	0	0	0	0	0
All	Bigelow Beach	2	low	n	150	Plate	6.51724	5.86207	45.1379	800	5.33333	5.8
2014-07-29	Hallover Bay	7	high	y	120	Brain	10	15	150	10	0.0833333	0.25
2014-07-29	Hallover Bay	7	high	y	120	Branching	6.8	6.93333	67.8	414	3.45	3.75
2014-07-29	Hallover Bay	7	high	y	120	Cup	0	0	0	0	0	0
2014-07-29	Hallover Bay	7	high	y	120	Encrusting	0	0	0	0	0	9
2014-07-29	Hallover Bay	7	high	y	120	Mound	12.32	11.72	192.52	707.889	5.89907	12.5
2014-07-29	Hallover Bay	7	high	y	120	Pillar	0	0	0	0	0	0
2014-07-29	Hallover Bay	7	high	y	120	Plate	10	7.5	75	20	0.166667	0.5
All	Crab Cove	1	high	y	293	Brain	21.6667	19.6667	426.5	116.937	0.399101	1.44444
All	Crab Cove	1	high	y	293	Branching	13.3333	12.9167	222.188	121.667	0.415245	1.33333
All	Crab Cove	1	high	y	293	Cup	0	0	0	0	0	0
All	Crab Cove	1	high	y	293	Encrusting	15.4348	12.6087	259.022	207.667	0.70876	2.55556
All	Crab Cove	1	high	y	293	Mound	17.2857	16.4821	327.145	1089	3.71672	11.6667
All	Crab Cove	1	high	y	293	Pillar	0	0	0	0	0	0
All	Crab Cove	1	high	y	293	Plate	6.66667	5.55556	38.8889	156.667	0.534699	0.888889
2014-08-07	Diamond Reef South	1	medium	y	84	Brain	12.5	12.5	150	16.6667	0.198413	1
2014-08-07	Diamond Reef South	1	medium	y	84	Branching	6.33333	5.77778	44.1111	300	3.57143	3.5
2014-08-07	Diamond Reef South	1	medium	y	84	Cup	0	0	0	0	0	0
2014-08-07	Diamond Reef South	1	medium	y	84	Encrusting	0	0	0	0	0	0
2014-08-07	Diamond Reef South	1	medium	y	84	Mound	14.8315	16.0225	386.649	1544.77	18.3902	29.5
2014-08-07	Diamond Reef South	1	medium	y	84	Pillar	0	0	0	0	0	0
2014-08-07	Diamond Reef South	1	medium	y	84	Plate	3.88889	3.88889	32.1111	566.667	6.74603	2.5
2014-07-23	George Dog East	3	low	n?	60	Brain	0	0	0	0	0	0
2014-07-23	George Dog East	3	low	n?	60	Branching	8.11111	4.88889	52.5556	368.333	6.13889	4.5
2014-07-23	George Dog East	3	low	n?	60	Cup	10	10	100	10	0.166667	0.5
2014-07-23	George Dog East	3	low	n?	60	Encrusting	10	5	50	10	0.166667	0.5
2014-07-23	George Dog East	3	low	n?	60	Mound	15.7684	13.0421	369.163	1721.65	28.6942	47.5
2014-07-23	George Dog East	3	low	n?	60	Pillar	0	0	0	0	0	0
2014-07-23	George Dog East	3	low	n?	60	Plate	3	3	13	120	2	1
2014-07-25	George Dog South	3	high	n?	120	Brain	15	10	150	6.66667	0.0555556	0.25
2014-07-25	George Dog South	3	high	n?	120	Branching	10	3.66667	43.1667	36.6667	0.305556	0.75
2014-07-25	George Dog South	3	high	n?	120	Cup	0	0	0	0	0	0
2014-07-25	George Dog South	3	high	n?	120	Encrusting	5	1	5	20	0.166667	0.25
2014-07-25	George Dog South	3	high	n?	120	Mound	5.36364	4.5	28.8409	655	5.45833	5.5
2014-07-25	George Dog South	3	high	n?	120	Pillar	0	0	0	0	0	0
2014-07-25	George Dog South	3	high	n?	120	Plate	7	4.2	27.6	80	0.666667	1.25
2014-07-29	Ginger Island South	7	low	y?	85	Brain	20	20	320	5	0.0588235	0
2014-07-29	Ginger Island South	7	low	y?	85	Branching	18.75	14.375	312.188	81.0238	0.953221	2.5
2014-07-29	Ginger Island South	7	low	y?	85	Cup	0	0	0	0	0	0
2014-07-29	Ginger Island South	7	low	y?	85	Encrusting	5	5	25	20	0.235294	0
2014-07-29	Ginger Island South	7	low	y?	85	Mound	16.2	15.7	361.992	474.872	5.58673	10
2014-07-29	Ginger Island South	7	low	y?	85	Pillar	0	0	0	0	0	0
2014-07-29	Ginger Island South	7	low	y?	85	Plate	2.33333	2.33333	9	220	2.58824	1.5
2014-07-25	Great Dog North Bay	3	low	n	90	Brain	52.5	32.5	1927.5	7.77778	0.0864198	0.666667
2014-07-25	Great Dog North Bay	3	low	n	90	Branching	15.7143	15.8571	348.393	162.413	1.80459	4.66667
2014-07-25	Great Dog North Bay	3	low	n	90	Cup	0	0	0	0	0	0
2014-07-25	Great Dog North Bay	3	low	n	90	Encrusting	5	10	50	20	0.222222	0.333333
2014-07-25	Great Dog North Bay	3	low	n	90	Mound	16.0286	12.8	251.8	896.246	9.95829	23.3333
2014-07-25	Great Dog North Bay	3	low	n	90	Pillar	0	0	0	0	0	0
2014-07-25	Great Dog North Bay	3	low	n	90	Plate	4	4	19	160	1.77778	1.33333
2014-07-23	Coral Gardens	3	high	y	90	Brain	5	5	25	20	0.222222	0.333333
2014-07-23	Coral Gardens	3	high	y	90	Branching	10.2	5.2	55.7	144	1.6	1.66667
2014-07-23	Coral Gardens	3	high	y	90	Cup	0	0	0	0	0	0
2014-07-23	Coral Gardens	3	high	y	90	Encrusting	0	0	0	0	0	0
2014-07-23	Coral Gardens	3	high	y	90	Mound	8.10526	6.28947	59.4211	785	8.72222	12.6667
2014-07-23	Coral Gardens	3	high	y	90	Pillar	15	10	150	6.66667	0.0740741	0.333333
2014-07-23	Coral Gardens	3	high	y	90	Plate	5	5	25	60	0.666667	1
2014-07-24	Great Harbor (Jost van Dyke)	4	low	n	90	Brain	30	25	750	3.33333	0.037037	0.333333
2014-07-24	Great Harbor (Jost van Dyke)	4	low	n	90	Branching	6.44444	5.33333	53.1111	383.333	4.25926	3
2014-07-24	Great Harbor (Jost van Dyke)	4	low	n	90	Cup	0	0	0	0	0	0
2014-07-24	Great Harbor (Jost van Dyke)	4	low	n	90	Encrusting	0	0	0	0	0	0
2014-07-24	Great Harbor (Jost van Dyke)	4	low	n	90	Mound	18.617	14.2553	352.487	1313.25	14.5917	31.3333
2014-07-24	Great Harbor (Jost van Dyke)	4	low	n	90	Pillar	0	0	0	0	0	0
2014-07-24	Great Harbor (Jost van Dyke)	4	low	n	90	Plate	2.90323	2.58065	11.2097	2190	24.3333	10.3333
All	Iguana Head	1	low	n	74	Brain	41.1111	36.6667	1670	38.5245	0.520602	4
All	Iguana Head	1	low	n	74	Branching	15.3571	13.2143	257.5	148.205	2.00277	4
All	Iguana Head	1	low	n	74	Cup	0	0	0	0	0	0
All	Iguana Head	1	low	n	74	Encrusting	20	15	405	42.381	0.572716	5
All	Iguana Head	1	low	n	74	Mound	18.3438	15.5833	375.424	972.072	13.1361	39
All	Iguana Head	1	low	n	74	Pillar	0	0	0	0	0	0
All	Iguana Head	1	low	n	74	Plate	9.71429	9.35714	105.429	289	3.90541	8
2014-08-03	Lee Bay	10	low	n	90	Brain	20	15	400	22.5	0.25	1
2014-08-03	Lee Bay	10	low	n	90	Branching	10.1429	10.1429	121.571	160	1.77778	2.33333
2014-08-03	Lee Bay	10	low	n	90	Cup	0	0	0	0	0	0
2014-08-03	Lee Bay	10	low	n	90	Encrusting	14.375	11.25	200	87.3333	0.97037	2.66667
2014-08-03	Lee Bay	10	low	n	90	Mound	13.2558	12.5581	276.105	529.468	5.88298	14.3333
2014-08-03	Lee Bay	10	low	n	90	Pillar	0	0	0	0	0	0
2014-08-03	Lee Bay	10	low	n	90	Plate	7.5	7.5	60	60	0.666667	1.33333
2014-07-26	Long Bay	5	high	y	120	Brain	15	12.5	180	26.6667	0.222222	1
2014-07-26	Long Bay	5	high	y	120	Branching	7.5	8.33333	42.9167	96.6667	0.805556	1.5
2014-07-26	Long Bay	5	high	y	120	Cup	5	1	5	20	0.166667	0.25
2014-07-26	Long Bay	5	high	y	120	Encrusting	7.5	6.25	41.875	66.6667	0.555556	1
2014-07-26	Long Bay	5	high	y	120	Mound	7.51429	6.62857	63.0543	1189.67	9.91389	8.75
2014-07-26	Long Bay	5	high	y	120	Pillar	0	0	0	0	0	0
2014-07-26	Long Bay	5	high	y	120	Plate	2.33333	3	9.66667	440	3.66667	1.5
All	Long Point	1	medium	y	150	Brain	32.9412	28.5294	1030.29	64.7587	0.431724	3.4
All	Long Point	1	medium	y	150	Branching	9	10	95	66.6667	0.444444	1
All	Long Point	1	medium	y	150	Cup	0	0	0	0	0	0
All	Long Point	1	medium	y	150	Encrusting	21.4286	13.5714	303.929	54.8182	0.365455	1.4
All	Long Point	1	medium	y	150	Mound	18.4483	15.9052	334.459	999.062	6.66042	23.2
All	Long Point	1	medium	y	150	Pillar	116.667	63.3333	5579.33	6.22222	0.0414815	0.6
All	Long Point	1	medium	y	150	Plate	8.71429	8.71429	125.143	184	1.22667	1.4
All	Monkey Point	2	medium	y	236	Brain	15.9091	13.1818	249.091	89.6667	0.379944	1.14286
All	Monkey Point	2	medium	y	236	Branching	5	5	12.5	20	0.0847458	0.142857
All	Monkey Point	2	medium	y	236	Cup	6.2	7.2	60.2	160	0.677966	0.714286
All	Monkey Point	2	medium	y	236	Encrusting	13.3333	6.83333	138.333	72.5	0.307203	0.714286
All	Monkey Point	2	medium	y	236	Mound	13.3667	12.0333	230.608	431.222	1.82721	3.57143
All	Monkey Point	2	medium	y	236	Pillar	0	0	0	0	0	0
All	Monkey Point	2	medium	y	236	Plate	5	5	25	40	0.169492	0.285714
2014-07-28	Mountain Point	5	low	y	74	Brain	10	5	50	10	0.135135	0.5
2014-07-28	Mountain Point	5	low	y	74	Branching	23.6667	25.3333	1330.33	111.667	1.50901	1.5
2014-07-28	Mountain Point	5	low	y	74	Cup	5	5	25	20	0.27027	0.5
2014-07-28	Mountain Point	5	low	y	74	Encrusting	11.6667	10	138.333	35	0.472973	1
2014-07-28	Mountain Point	5	low	y	74	Mound	13.6613	12.2742	205.605	840.27	11.355	23.5
2014-07-28	Mountain Point	5	low	y	74	Pillar	0	0	0	0	0	0
2014-07-28	Mountain Point	5	low	y	74	Plate	6.25	4.625	32.5	140	1.89189	3.5
2014-07-20	Bigelow Beach South	2	low	n	90	Brain	20	10	200	10.6667	0.118519	0.666667
2014-07-20	Bigelow Beach South	2	low	n	90	Branching	8	8	71	161.667	1.7963	3.33333
2014-07-20	Bigelow Beach South	2	low	n	90	Cup	10	10	100	10	0.111111	0.333333
2014-07-20	Bigelow Beach South	2	low	n	90	Encrusting	0	0	0	0	0	0
2014-07-20	Bigelow Beach South	2	low	n	90	Mound	14.5789	12.2105	212.474	643.556	7.15062	19
2014-07-20	Bigelow Beach South	2	low	n	90	Pillar	0	0	0	0	0	0
2014-07-20	Bigelow Beach South	2	low	n	90	Plate	5.375	5.0625	42.5625	746.667	8.2963	5.33333
2014-07-30	White Bay Control	8	low	n	62	Brain	15	16.6667	306.667	33.3333	0.537634	1
2014-07-30	White Bay Control	8	low	n	62	Branching	6.88889	9.55556	69	305	4.91935	4.5
2014-07-30	White Bay Control	8	low	n	62	Cup	7.5	7.5	62.5	30	0.483871	1
2014-07-30	White Bay Control	8	low	n	62	Encrusting	0	0	0	0	0	0
2014-07-30	White Bay Control	8	low	n	62	Mound	16.1579	15.2807	270.939	652.588	10.5256	26.5
2014-07-30	White Bay Control	8	low	n	62	Pillar	0	0	0	0	0	0
2014-07-30	White Bay Control	8	low	n	62	Plate	10	8.33333	81.6667	36.6667	0.591398	1.5
2014-07-30	White Bay Mega	8	high	n	90	Brain	0	0	0	0	0	0
2014-07-30	White Bay Mega	8	high	n	90	Branching	0	0	0	0	0	0
2014-07-30	White Bay Mega	8	high	n	90	Cup	5	10	50	20	0.222222	0.333333
2014-07-30	White Bay Mega	8	high	n	90	Encrusting	0	0	0	0	0	0
2014-07-30	White Bay Mega	8	high	n	90	Mound	10	7.66667	83	200	2.22222	5
2014-07-30	White Bay Mega	8	high	n	90	Pillar	0	0	0	0	0	0
2014-07-30	White Bay Mega	8	high	n	90	Plate	5	1	5	20	0.222222	0.333333
2014-07-20	Pinguin Ghut	2	high	y	90	Brain	20	17.5	362.5	10.6667	0.118519	0.666667
2014-07-20	Pinguin Ghut	2	high	y	90	Branching	5	5	25	20	0.222222	0.333333
2014-07-20	Pinguin Ghut	2	high	y	90	Cup	0	0	0	0	0	0
2014-07-20	Pinguin Ghut	2	high	y	90	Encrusting	20	15	120	5	0.0555556	0.333333
2014-07-20	Pinguin Ghut	2	high	y	90	Mound	8.73913	7.21739	70.5652	426.667	4.74074	7.66667
2014-07-20	Pinguin Ghut	2	high	y	90	Pillar	0	0	0	0	0	0
2014-07-20	Pinguin Ghut	2	high	y	90	Plate	7.5	4	28.75	66.6667	0.740741	1.33333
2014-07-23	Dip n Scrub	2	low	y	66	Brain	5	5	25	40	0.606061	0.5
2014-07-23	Dip n Scrub	2	low	y	66	Branching	13.1667	11.0833	156.708	358.333	5.42929	10.5
2014-07-23	Dip n Scrub	2	low	y	66	Cup	1	5	5	100	1.51515	0.5
2014-07-23	Dip n Scrub	2	low	y	66	Encrusting	13.3333	10	126.667	23.3333	0.353535	1.5
2014-07-23	Dip n Scrub	2	low	y	66	Mound	14.0877	11.5439	185.846	831.944	12.6052	23.5
2014-07-23	Dip n Scrub	2	low	y	66	Pillar	50	10	500	2	0.030303	0.5
2014-07-23	Dip n Scrub	2	low	y	66	Plate	14.2857	8.57143	157.143	85.5556	1.2963	3
All	White Bay	2	high	y	240	Brain	0	0	0	0	0	0
All	White Bay	2	high	y	240	Branching	4.6	5.1	23.85	280	1.16667	1.25
All	White Bay	2	high	y	240	Cup	0	0	0	0	0	0
All	White Bay	2	high	y	240	Encrusting	1	1	1	100	0.416667	0.125
All	White Bay	2	high	y	240	Mound	11.9474	10.9123	143.373	802.048	3.34187	7.125
All	White Bay	2	high	y	240	Pillar	0	0	0	0	0	0
All	White Bay	2	high	y	240	Plate	4.75	6	47.25	386.667	1.61111	1
2014-07-24	White Bay Jost	4	high	y	120	Brain	0	0	0	0	0	0
2014-07-24	White Bay Jost	4	high	y	120	Branching	17.7778	15	348.889	90.7143	0.755952	2.25
2014-07-24	White Bay Jost	4	high	y	120	Cup	0	0	0	0	0	0
2014-07-24	White Bay Jost	4	high	y	120	Encrusting	8.33333	3.66667	35	46.6667	0.388889	0.75
2014-07-24	White Bay Jost	4	high	y	120	Mound	13.8906	13.2656	242.172	1036.62	8.63849	16
2014-07-24	White Bay Jost	4	high	y	120	Pillar	0	0	0	0	0	0
2014-07-24	White Bay Jost	4	high	y	120	Plate	5.25	4.3125	25.4062	600	5	4

## Sheet: Sites
Site	Group	Anchoring	Anch_Val	Moorings	Total_Tran_D	AvgN_Corals	AvgN_Sp	AvgStrngVal	sum(1/L_m)	StrngVal	AvgL	AvgW	AvgLiveArea
Bails Ground Bay	10	high	c	n	120	14.25	5.75	8.79117	1054.94	8.79117	10.4912	10.1404	110.754
Bigelow Beach	2	low	a	n	150	26	9	19.8531	2977.97	19.8531	12.1615	10.9462	182.508
Bigelow Beach South	2	low	a	n	90	28.6667	9.66667	17.4728	1572.56	17.4728	12.1744	10.314	162.814
Coral Gardens	3	high	c	y	90	19.3333	5.33333	11.2852	1015.67	11.2852	16.1319	13.2857	291.038
Crab Cove	1	high	c	y	293	17.6	8.11111	5.87053	1730.27	5.90535	16.6534	15.3466	302.537
Diamond Reef South	6	medium	b	y	84	36.3333	9.5	29.1204	2428.11	28.9061	13.1835	14.1101	324.75
DipnScrub	6	low	a	y	66	31.6667	13	26.371	1441.17	21.8359	13.8947	10.9368	172.518
George Dog East	3	low	a	n	60	54	11.5	37.1664	2229.99	37.1664	14.787	12.0741	330.736
George Dog South	3	high	c	y	120	8	4.25	6.65278	798.333	6.65278	6.34375	4.4375	33.0312
Ginger Island South	7	low	a	y	85	14.3333	7.5	9.25176	800.896	9.4223	15.5349	14.3721	319.285
Great Dog North	3	low	a	n	90	30.3333	9.33333	13.8493	1246.44	13.8493	8.20833	6.14583	58.0521
Great Harbor	4	low	a	n	90	45	6	43.2213	3889.92	43.2213	14.2815	11.0593	257.106
Haulover Bay	7	high	c	y	120	17	6	9.59907	1151.89	9.59907	11	10.5882	160.926
Iguana Head	1	low	a	n	74	46	14	19.3611	1490.18	20.1376	18.7101	16.0652	421.571
Lee Bay	10	low	a	n	90	21.6667	7.66667	9.5478	859.302	9.5478	13.0154	11.9385	242.515
Long Bay	5	high	c	y	120	14	8	15.3306	1839.67	15.3306	7.44643	6.71429	60.9804
Long Point	1	medium	b	n	150	31	9.6	9.17019	1375.53	9.17019	21.329	17.5871	493.734
Monkey Point	2	medium	b	y	236	6.875	4.14286	3.43816	813.389	3.44656	12.7636	10.8727	197.305
Mountain Point	5	low	a	y	74	26	11	16.1945	1156.94	15.6343	13.0513	11.7179	224.212
Pinguin Ghut	2	high	c	y	90	10.3333	5.33333	5.87778	529	5.87778	9.54839	7.64516	84.129
White Bay	2	high	c	y	240	9.5	4.875	6.53631	1568.71	6.53631	10.0789	9.5	115.655
White Bay Control	8	low	a	n	62	24.6667	11.5	17.7139	1057.59	17.0579	14.5	14.1486	234.52
White Bay Jost	4	high	c	y	120	23	6.5	14.7833	1774	14.7833	12.587	11.5652	208.158
White Bay Mega	8	high	c	n	90	5.66667	3.66667	2.66667	240	2.66667	9.41176	7.41176	76.4706

## Sheet: Damage
Site	Group	Anchoring	Moorings	Over_HC	Broken_HC	Broken_SC	Over_SC	Broken_SeaFan	Broken_FC	AllDamage
Bails Ground Bay	10	high	n	0.05	0.0166667	0.308333	0.233333	0.0916667	0.0333333	0.791667
Bigelow Beach	2	low	n	0.00666667	0	0.0333333	0.04	0.146667	0.0133333	0.24
Bigelow Beach South	2	low	n	0.0222222	0	0	0.0222222	0.0888889	0	0.133333
Coral Gardens	3	high	y	0.0111111	0.0333333	0.0888889	0.111111	0.0444444	0.0333333	0.344444
Crab Cove	1	high	y	0	0	0.144444	0.0555556	0.122222	0.0333333	0.411111
Diamond Reef South	1	medium	y	0	0.0119048	0	0.0714286	0.238095	0.0357143	0.321429
Dip'n'Scrub	2	low	y	0	0	0.030303	0.0151515	0.0151515	0.0454545	0.0757576
George Dog East	3	low	n	0	0	0	0.0333333	0.05	0.0333333	0.116667
George Dog South	3	high	y	0	0	0.0416667	0.1	0.025	0.0333333	0.2
Ginger Island South	7	low	y	0	0	0	0	0.0352941	0.0352941	0.0352941
Great Dog North	3	low	n	0	0	0	0.0222222	0.0111111	0.0333333	0.0666667
Great Harbor	4	low	n	0	0	0.0111111	0.0333333	0.0666667	0.0333333	0.133333
Haulover Bay	7	high	y	0.00833333	0	0.025	0.05	0.0416667	0.0333333	0.125
Iguana Head	1	low	n	0	0	0.037037	0	0.5	0.037037	0.574074
Lee Bay	10	low	n	0	0	0.133333	0.233333	0.0333333	0.0333333	0.444444
Long Bay	5	high	y	0.0416667	0.00833333	0.141667	0.258333	0.141667	0.0333333	0.758333
Long Point	1	medium	y	0.0166667	0	0.0833333	0.116667	0.0833333	0.0333333	0.316667
Monkey Point	2	medium	y	0.00423729	0	0.0720339	0.0466102	0.114407	0.0169492	0.237288
Mountain Point	5	low	y	0	0	0.0405405	0.0540541	0.108108	0.0405405	0.22973
Pinguin Ghut	2	high	y	0	0	0.0666667	0	0.0333333	0	0.1
White Bay	2	high	y	0.0458333	0.00833333	0.0541667	0.0291667	0.0125	0.0166667	0.1625
White Bay Control	8	low	n	0	0	0.112903	0.016129	0.16129	0.0483871	0.322581
White Bay Jost	4	high	y	0.0166667	0.0166667	0.025	0.00833333	0.025	0.0333333	0.0916667
White Bay Mega	8	high	n	0.0425532	0.0638298	0.244681	0.37234	0.223404	0.0425532	1

## Sheet: Fish
RF_Site	Island	Anchoring	Moorings	Lionfish_removal	Group	GF_site	totnofish	totadfsh	totjuvfish	plankta	planktj	herbdamsa_not3spot	adrovherba	rovherbj	totherba	pisciva	spongea	scrapera	bencarn1	bencarn2	bencarn	omniva	Njuvenilefishspecies	Nfishspeciesfortmula	Nadultfishspecies	popla
Bigelow Beach	Guana	low	n	low	2	bigelow	63.6667	49.833	13.8333	4.83333	0.667	5.16667	21.1667	10.1667	37.6667	1	0.33	0.5	5.16667	1	6.16667	0	4.33	17.33	13	11.333
Bigelow South	Guana	low	n	low	2	Bigelow South	130.5	92.5	38	17	1.5	6	43.25	25.25	53.75	2.5	0.25	1.25	21	0.25	21.25	1.25	5.5	23	17.5	4.5
Coral Gardens	The Dogs	high	y	high	3	Coral Gardens	67.6667	48.667	19	15.6667	7	4	15.6667	8.66667	22.3333	0.666667	0	1.66667	8.66667	0.333	9	1.33333	4.33	19.67	15.33	2.667
Crab Cove	Guana	high	y-7mon	?	1	crab	37.75	27.5	10.25	0.75	0.25	7	7.25	7	16	2	0	0.5	5.5	0	5.5	2.75	3	15	12	1.75
Diamond Reef	Great Camanoe	medium	y	low	1	Diamond Reef	125.333	124	1.33333	26	0.667	4.33333	16.6667	0	72.6667	9	0.67	2.66667	24.3333	3.667	28	1	1	21.67	20.67	51.667
Diamond Reef South	Great Camanoe	medium	y	low	1	Diamond South	93.25	88	5.25	12.25	0.5	7	11	2.75	59.25	2.75	0.25	1	13	3.25	16.25	1.25	2	19	17	41.25
Dip'n'Scrub	Scrub Island	low	y	low	2	Dip n Scrub	83.3333	77.333	6	9.66667	2	2.33333	38	2.33333	46.3333	2.33333	0.33	2.66667	15.3333	0.667	16	2	3.33	20.33	17	6
George Dog East	The Dogs	low	?	?	3	George Dog East	100	85.333	14.6667	12.3333	0.667	6	23	9	60	1.66667	0.33	3.66667	9	0	9	2	5	19.67	14.67	31
George Dog South	The Dogs	high	n?	low	3	George Dog South	32.5	20.5	12	4.75	2	0.75	8.5	3.75	9.25	0.75	0	0.25	5	0	5	0.75	2.5	12	9.5	0
Ginger Island South	Ginger Island	low	y?	high	7	Ginger Island South	200.667	131.667	69	70.3333	39.667	6	26.3333	22.6667	32.6667	5	1	5.33333	14	2	16	0.33333	8.67	34.67	26	0.333
Great Dog North	The Dogs	low	n	low	3	Great Dog North	92.05	75.45	16.6	16.75	0.25	5.9	30.45	11.4	43.35	1.9	0	3.65	11.55	0.85	12.4	2.05	4.75	22.75	18	7
Great Harbor	Jost van Dyke	high	n- some in bay but none where we dove	high	4	Great Harbor	94.6667	75.333	19.3333	5	2.667	10.6667	19.3333	4	58.3333	1.33333	0	2	9	0.667	9.66667	1.33333	4	17.67	13.67	28.333
Haulover Bay	Cooper Island	high	y	low	7	Haulover Bay	70.25	48.5	21.75	21.25	12.25	3	12.25	5.75	16.25	0.5	0	2	8.75	0	8.75	1	6	20.25	14.25	1
Iguana Head	Guana	low	n	high	1	iguana	141.75	100.625	41.125	19.375	2.375	9.625	28.375	30.125	62.125	4	1.25	3.625	12	0.75	12.75	1.625	7	26.75	19.75	24.125
Lee Bay	Great Camanoe	low	y-not near where we went though	high	10	Lee Bay	42.5	21.25	21.25	0.25	0	5	7.75	19.25	12.75	1	0.5	0.5	5.75	0.25	6	1.25	3	14	11	0
Long Bay	Virgin Gorda	high	y	low	5	Long Bay	26.75	14.25	12.5	2	0.25	1.75	4.5	11	7.25	1.75	0	0.5	3.25	0	3.25	0	3	10.5	7.5	1
Monkey Point	Guana	medium	y	high	2	monkey	59.875	32.875	27	1.375	0.25	3	18.75	24.25	22	0.625	0	1.125	5	0.5	5.5	3.625	3.75	14.25	10.5	0.25
Mountain Point	Virgin Gorda	low	y	?	5	Mountain Point	50.5	39.75	10.75	0	0.25	5	21.25	9.75	28.5	1.75	0.25	0.75	7.5	1	8.5	2	2.75	18.5	15.75	2.25
Long Point	Guana	medium	y-7mon	high	1	muskN	103.906	70.375	33.5312	11.8125	0.25	12.4688	12.5938	25.9688	42.0625	2.6875	0	3.1875	11.5938	0.5	12.0938	1.96875	4.5	20	15.5	17
Pinguin Ghut	Guana	high	y	high	2	Pinguin Ghut	63.6667	41.5	22.1667	4.33333	0.333	4	13.8333	17	19.1667	0.5	0	0	11.1667	0.667	11.8333	5.66667	4	14.67	10.67	1.333
White Bay	Guana	high	y-7mon	?	2	white	91.625	49.875	41.75	7.625	0.25	5.75	16.125	30.875	25.5	1.75	0	2.125	14.75	0.25	15	2.375	4.75	18.5	13.75	3.625
White Bay Control	Peter Island	low	n	?	8	White Bay Control	163.333	118.667	44.6667	48	13.333	5	27.6667	27.3333	42.6667	4.66667	0.33	4.66667	13.6667	4.333	18	1.66667	8	29.33	21.33	10
White Bay Jost	Jost van Dyke	high	y	high	4	White Bay Jost	39.5	23.75	15.75	1.5	2.75	5.25	4.75	3.25	13.25	1.75	0	1.25	7.25	0	7.25	0.5	5.25	16	10.75	3.25
White Bay Mega	Peter Island	high	n	?	8	White Bay Mega	42.5	22.5	20	5.75	5.75	2.25	7.25	11.25	9.5	0.5	0.25	0.25	6	0	6	0.5	5.25	13.75	8.5	0

## Sheet: Rugosity
Date	Location	Group	Anchoring	Anch_Val	Moorings	A_sumsqd	A_sqrtsumsqd	trans
2014-07-16	Crab Cove	1	high	c	y	18698	132.875	11.5271
2014-07-28	Diamond Reef	1	medium	b	y	51066.7	219.239	14.8067
2014-08-05	Iguana Head	1	low	a	n	33206.2	179.777	13.4081
2014-07-17	Long Point	1	medium	b	n	27590	164.918	12.8421
2014-08-07	South of Diamond Reef	1	medium	b	y	37750	192.207	13.8639
2014-07-20	Near Bigelow Beach	2	low	a	n	11529.3	107.026	10.3454
2014-08-04	Bigelow Beach	2	low	a	n	14933.3	117.607	10.8447
2014-07-23	Dip n Scrub	2	low	a	y	32241.7	170.66	13.0637
2014-07-19	Monkey Point	2	medium	b	y	8906.5	93.7105	9.68042
2014-07-20	Pinguin Guht	2	high	c	y	8950	94.4245	9.71723
2014-07-19	White Bay	2	high	c	y	9134.38	92.1863	9.60137
2014-07-23	Coral Gardens	3	high	c	y	13176	112.195	10.5922
2014-07-23	George Dog East	3	low	a	n	46462.5	205.133	14.3224
2014-07-25	George Dog South	3	high	c	y	7243.75	84.6886	9.20264
2014-07-25	Great Dog North Bay	3	low	a	n	29868.8	172.225	13.1235
2014-07-24	Great Harbor	4	low	a	n	20900	144.242	12.0101
2014-07-24	WB JVD	4	high	c	y	8618.75	88.7252	9.4194
2014-07-26	Long Bay North	5	high	c	y	10687.5	103.018	10.1498
2014-07-28	Mountain Point	5	low	a	y	31337.5	176.444	13.2832
2014-07-29	Ginger South	7	low	a	y	99806.2	312.495	17.6775
2014-07-29	Haulover Bay	7	high	c	y	29075	169.198	13.0076
2014-07-30	White Bay Control	8	low	a	n	62043.8	247.709	15.7388
2014-07-30	White Bay Mega	8	high	c	n	8975	93.7931	9.68468
2014-08-06	Bails Ground Bay	10	high	c	n	12668.8	111.082	10.5396
2014-08-03	Lee Bay	10	low	a	n	23568.8	147.511	12.1454
